# Supplementary material
Source: PubMed Central journal article supplement (PMC5557687)
Supplement: NIHMS858019-supplement-10.pdf [file NIHMS858019-supplement-10.pdf]

### Supplementary Figure S10 Holditch et al.

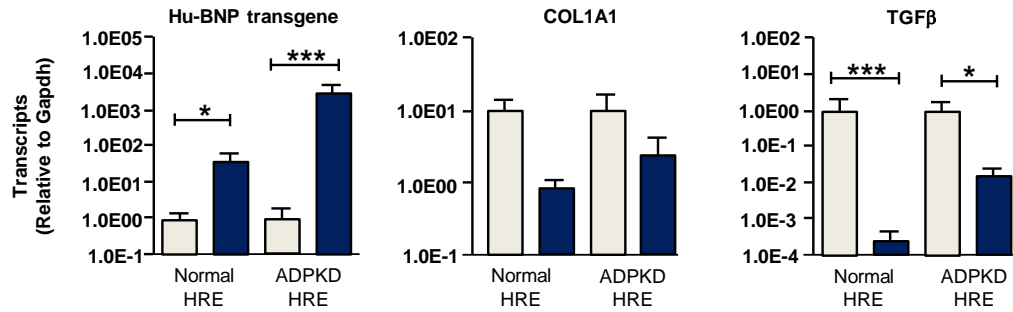

**Supplementary Fig. S10. BNP treatment suppresses COL1A1 and TGFβ expression in human renal epithelial cell lines.** Patient derived noncystic Normal Human Renal Epithelial (HRE) and cystic human renal epithelial cells (ADPKD HRE) were transduced with lentiviral vectors expressing control Green Fluorescent Protein (Lenti-GFP, gray bars) or codon optimized Human BNP (Lenti-Hu-BNP, blue bars). Expression of human BNP transgene was verified by real time RT-PCR quantification (left panel). Relative transcript levels of profibrotic gene, Collagen type 1a1 (COL1A1) and transforming growth factor-β (TGFβ), were determined by real time RT-PCR and normalized by Gapdh transcripts with Gapdh. Data were shown ± SEM. \* $P < 0.05$  and \*\*\* $P < 0.001$  (vs. Lenti-GFP control).
